# Supplementary material for: Diabetes distress in Indian children with type 1 diabetes mellitus and their mothers
Source: publisher site journal article supplement (doi:10.1515/jpem-2020-0339), 2020-11-13
Supplement: Supplementary file 2 [file j_jpem-2020-0339_suppl.docx]

**Supplement Table. Frequency of scores of various questions of PAID-Peds& PAID-PR**

| **CHILD** | **Not a problem** | **Minor Problem** | **Moderate Problem** | **Somewhat serious problem** | **Serious Problem** |
| --- | --- | --- | --- | --- | --- |
| I feel upset when my blood sugars are out of range | 23 (32.6%) | 5 (7.6%) | 1 (1.5%) | 1 (1.5%) | 38 (56.7%) |
| Feeling discouraged with my diabetes treatment plan | 27 (40.3%) | 8 (11.9%) | 5 (7.5) | 0 | 27 (40.3%) |
| Feeling scared when I think about living with diabetes | 33 (49.3%) | 13 (19.4%) | 6 (9%) | 1 (1.5%) | 14 (20.9%) |
| I have difficulty dealing in school (example- classmates and teachers) | 42 (65.7%) | 8 (11.9%) | 4 (6%) | 2 (3%) | 11 (16.4%) |
| Feelings of deprivation regarding food and meals | 44 (65.7%) | 9 (13.4%) | 6 (9%) | 1 (1.5%) | 7 (10.4%) |
| I feel embarrassed about having diabetes | 33 (49.3%) | 13 (19.4%) | 8 (11.9%) | 1 (1.5) | 12 (17.9%) |
| I am annoyed when I have to stop what I am doing to check my blood sugar | 35 (52.2%) | 5 (7.5%) | 11 (16.4%) | 3 (4.5%) | 13 (19.4%) |
| Feeling overwhelmed by your diabetes | 46 (68.7%) | 8 (11.9%) | 7 (10.4%) | 2 (3%) | 4 (6%) |
| Worrying about low blood sugar reactions? | 40 (61.2%) | 14 (20.9%) | 6 (3%) | 0 | 6 (3%) |
| Feeling angry when I think about living with diabetes? | 37 (55.2%) | 10 (14.9%) | 4 (6%) | 3 (4.5%) | 13 (19.4%) |
| Feeling constantly concerned about food and eating? | 43 (64.2%) | 14 (20.9%) | 4 (6%) | 1 (1.5%) | 5 (7.5%) |
| Worrying about the future and the possibility of serious complications? | 43 (64.2%) | 12 (17.9%) | 3 (4.5%) | 2 (3%) | 7 (10.4%) |
| Feelings of guilt or anxiety when I get off track with my diabetes management? | 49 (73.1%) | 7 (10.4%) | 4 (6%) | 0 | 7 (10.4%) |
| I worry that I will not be able to take care of myself when away from home | 43 (64.2%) | 11 (16.4%) | 3 (4.5%) | 1 (1.5%) | 9 (13.4%) |
| I feel that I am excluded from activities or events because of my diabetes | 63 (94%) | 3 (4.5%) | 1 (1.5%) | 0 | 0 |
| Feeling that diabetes is taking up too much of my mental and physical energy every day | 43 (64.2%) | 13 (19.4%) | 5 (7.5%) | 2 (3%) | 4 (6%) |
| Feeling alone with diabetes? | 32 (47.8%) | 9 (13.4%) | 5 (7.5%) | 3 (4.5%) | 18 (26.9%) |
| Feeling that my friends and family are not supportive of your diabetes management efforts? | 57 (85.1%) | 5 (7.5%) | 3 (4.5%) | 1 (1.5%) | 1 (1.5%) |
| I worry whether I will remember to eat my snack | 50 (75%) | 5 (7.5%) | 4 (6.5%) | 5 (8%) | 2 (3%) |
| Feeling “burned out” by the constant effort needed to manage diabetes | 38 (56.7%) | 7 (10.4%) | 11 (16.4%) | 3 (4.5%) | 8 (11.9%) |
| **PARENTS** | **Not a problem** | **Minor Problem** | **Moderate Problem** | **Somewhat serious problem** | **Serious Problem** |
| I feel discouraged with my child’s diabetes treatment plan. | 18 (28.4%) | 4 (6%) | 6 (9%) | 0 | 38 (56.7%) |
| I have difficulty dealing with school staff (e.g., nurses, teachers, principals). | 45 (67.2%) | 8 (11.9%) | 2 (3%) | 0 | 12 (18.5%) |
| I feel that my child is deprived regarding food and meals. | 25 (37.3%) | 14 (20.9%) | 11 (16.4%) | 2 (3%) | 15 (22.4%) |
| I feel that my child is excluded from activities/events because of his/her diabetes. | 51 (76.1%) | 3 (4.5%) | 2 (3%) | 2 (3%) | 9 (13.4%) |
| I feel that diabetes takes up too much mental and physical energy. | 38 (56.7%) | 9 (13.4%) | 5 (7.5%) | 2 (3%) | 13 (19.4%) |
| I feel alone in managing my child’s diabetes. | 43 (64.2%) | 5 (7.5%) | 8 (11.9%) | 1 (1.5%) | 10 (14.9%) |
| I feel that other family members are not supportive in managing my child’s diabetes. | 47 (70.2%) | 8 (11.9%) | 4 (11.9%) | 0 | 8 (11.9%) |
| I worry whether or not my child will remember to eat his/her snack. | 42 (62.7%) | 9 (13.4%) | 7 (10.4%) | 1 (1.5%) | 8 (11.9%) |
| I feel “burned out” by the constant effort to manage diabetes. | 30 (44.8%) | 9 (13.4%) | 8 (11.9%) | 4 (6%) | 16 (23.9%) |
| I feel scared when thinking about my child having/living with diabetes. | 26 (38.8%) | 8 (11.9%) | 5 (7.5%) | 3 (4.5%) | 25 (37.3%) |
| I feel upset when my child’s blood sugars are out of range. | 29 (43.3%) | 13 (19.4%) | 8 (11.9%) | 3 (4.5%) | 14 (20.9%) |
| I worry about my child having a low blood sugar. | 30 (44.8%) | 10 (14.9%) | 5 (7.5%) | 4 (6%) | 15 (22.4%) |
| I feel angry when I think about my child having/living with diabetes | 36 (53.8%) | 7 (10.4%) | 4 (6%) | 5 (7.5%) | 15 (22.4%) |
| I feel constantly concerned about what my child eats | 37 (55.2%) | 12 (17.9%) | 5 (7.5%) | 2 (3%) | 11 (16.4%) |
| I worry about the future and the possibility of serious complications for my child | 32 (47.8%) | 10 (14.9%) | 6 (9%) | 2 (3%) | 17 (25.4%) |
| I feel upset when my child’s diabetes management is “off track”. | 29 (43.3%) | 6 (9%) | 17 (25.4%) | 4 (6%) | 11 (16.4%) |
| I worry that my child will not be taken care of when away from home. | 42 (62.7%) | 8 (11.9%) | 5 (7.5%) | 1 (1.5%) | 11 (16.4%) |
| I feel like the “diabetes police”. | 50 (74.6%) | 6 (9%) | 2 (3%) | 1 (1.5%) | 8 (11.9%) |
